# Supplementary material
Source: PubMed Central journal article supplement (PMC3873139)
Supplement: NIHMS537983-supplement-1_si_001.pdf [file NIHMS537983-supplement-1_si_001.pdf]

# The influence of heme ruffling on spin densities in ferricytochromes *c* probed by heme core $^{13}\text{C}$ NMR

*Jesse G. Kleingardner, Sarah E. J. Bowman, Kara L. Bren\**

Department of Chemistry, University of Rochester, Rochester, New York 14627-0216

## Supporting Information

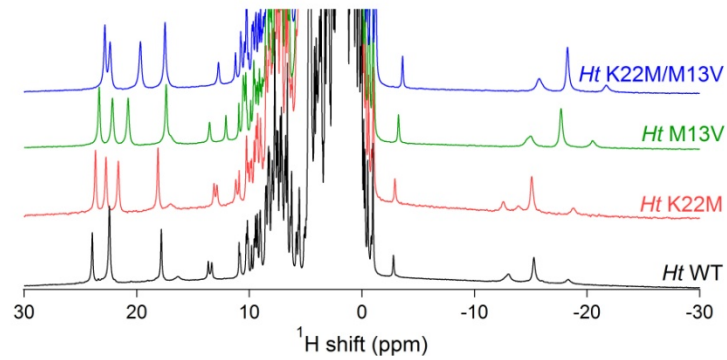

**Figure S1.**  $^1\text{H}$  NMR spectra of the *Ht* series of variants and *Ht* WT in the  $\text{Fe}^{\text{III}}$  oxidation state.

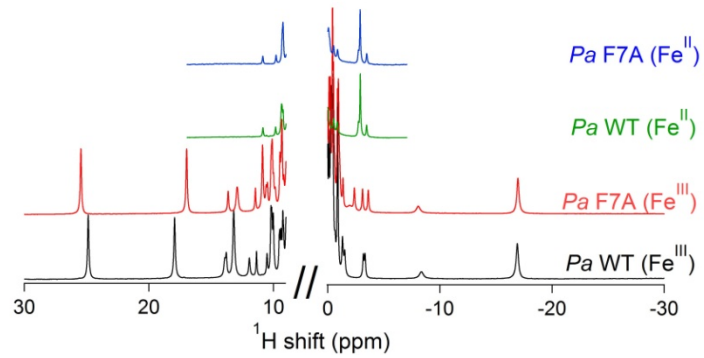

**Figure S2.**  $^1\text{H}$  NMR spectra of *Pa* WT and *Pa* F7A in both the  $\text{Fe}^{\text{III}}$  and  $\text{Fe}^{\text{II}}$  oxidation states.

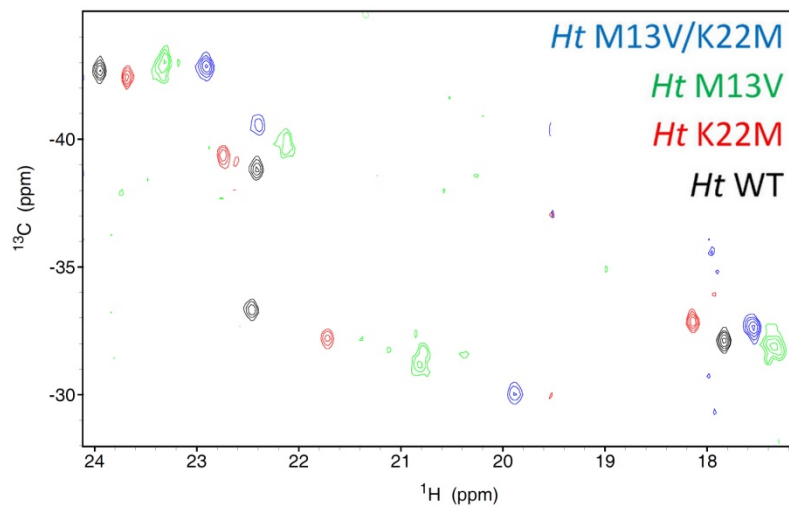

**Figure S3.** Overlay of natural-abundance  $^1\text{H}$ - $^{13}\text{C}$  HMQC spectra showing heme methyls of *Ht* series of mutants in the  $\text{Fe}^{\text{III}}$  oxidation state.

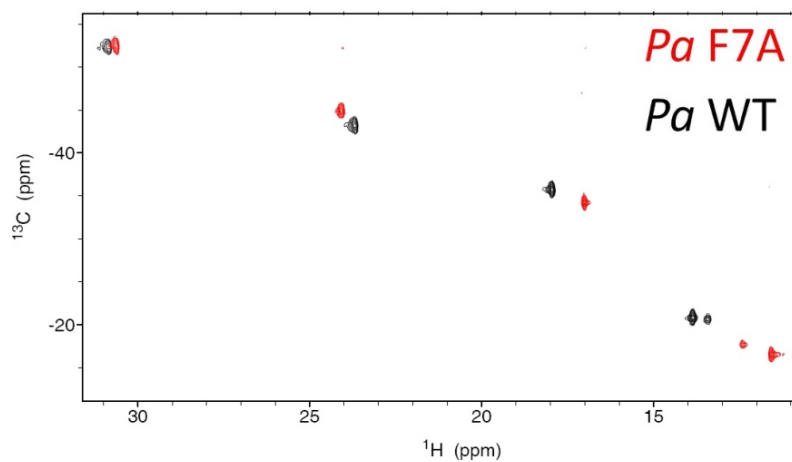

**Figure S4.** Overlay of natural-abundance  $^1\text{H}$ - $^{13}\text{C}$  HMQC spectra showing heme methyls of *Pa* WT and *Pa* F7A in the  $\text{Fe}^{\text{III}}$  oxidation state.

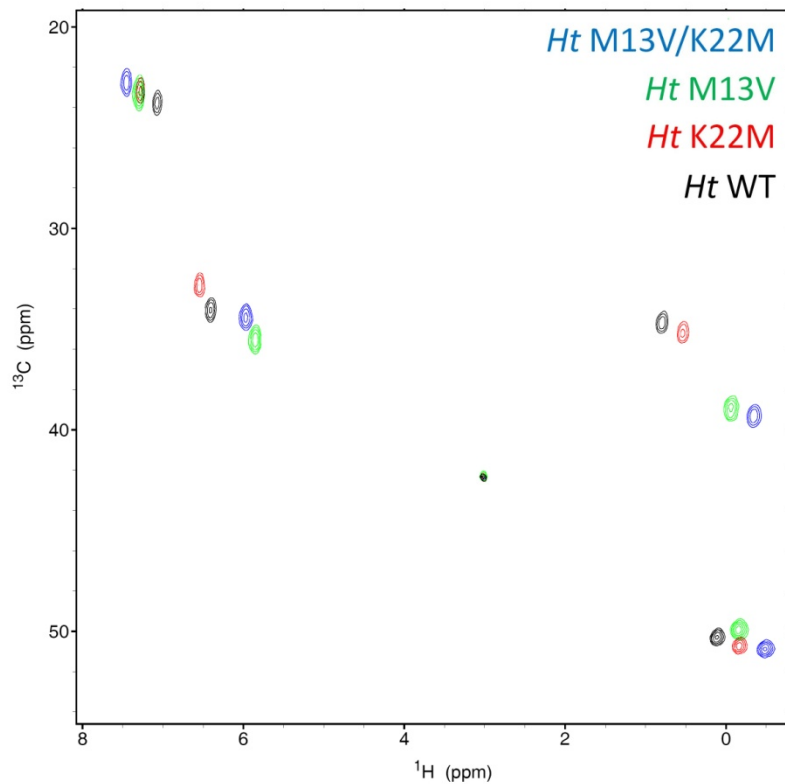

**Figure S5.** Overlay of  $^1\text{H}$ - $^{13}\text{C}$  HMQC spectra of 5- $^{13}\text{C}$ -ALA labeled *Ht*-series of mutants in the  $\text{Fe}^{\text{III}}$  oxidation state.

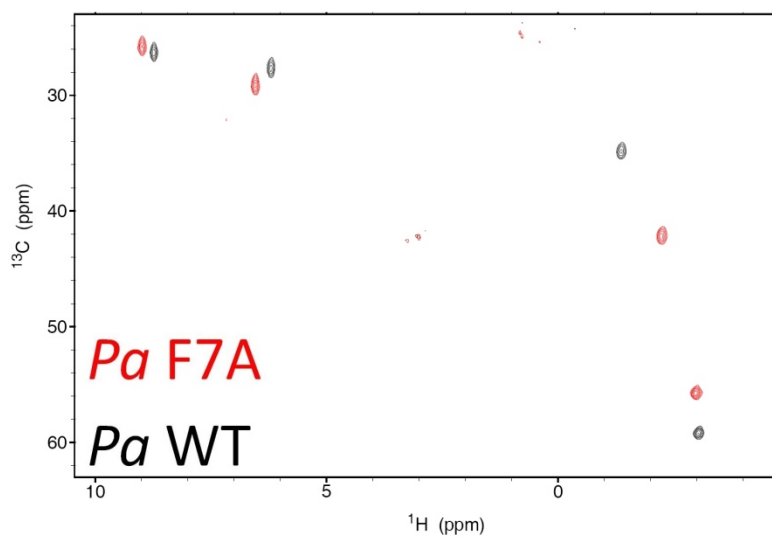

**Figure S6.** Overlay of  $^1\text{H}$ - $^{13}\text{C}$  HMQC spectra of 5- $^{13}\text{C}$ -ALA-labeled *Pa* WT and *Pa* F7A in the  $\text{Fe}^{\text{III}}$  oxidation state.

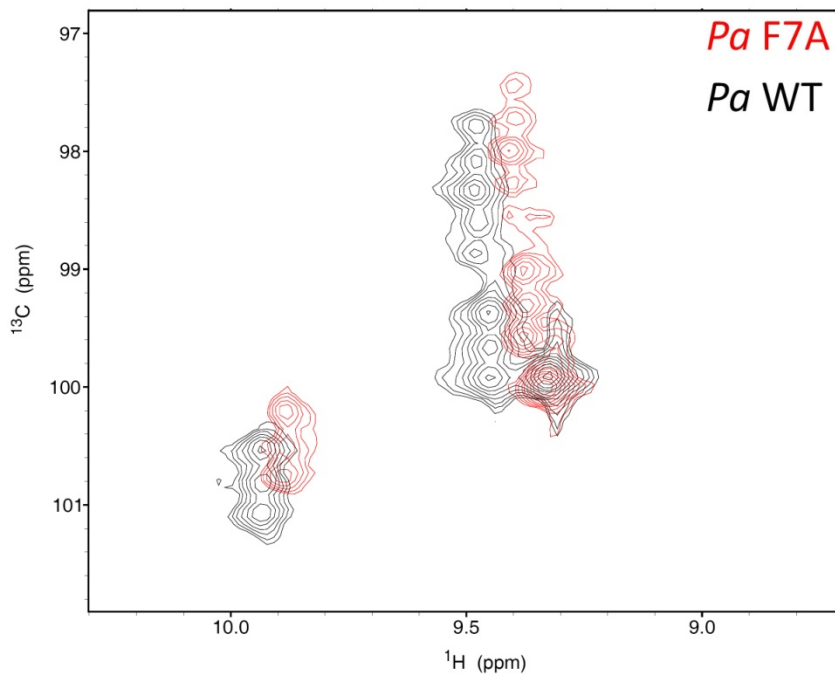

**Figure S7.** Overlay of  $^1\text{H}$ - $^{13}\text{C}$  HMQC spectra of 5- $^{13}\text{C}$ -ALA labeled *Pa* WT and *Pa* F7A in the  $\text{Fe}^{\text{II}}$  oxidation state.

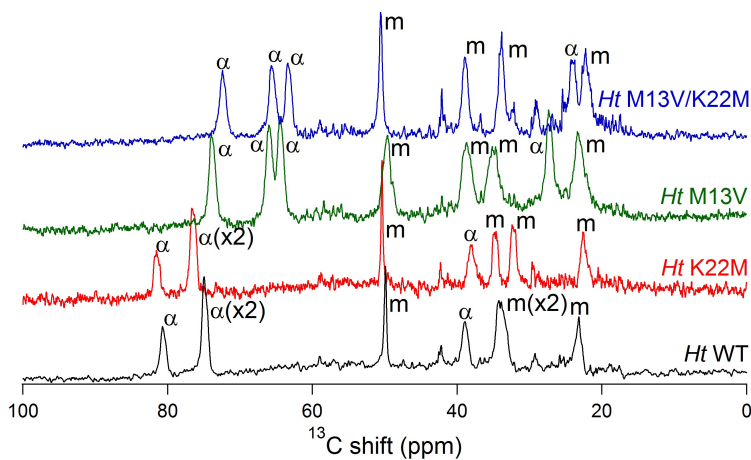

**Figure S8.** 1-D  $^{13}\text{C}$  NMR spectra of the *Ht* series of variants in the  $\text{Fe}^{\text{III}}$  oxidation state labeled with 5- $^{13}\text{C}$ -ALA. Peaks are labeled according to their assignment as a meso (m) or  $\alpha$ -pyrrole ( $\alpha$ ) carbon.

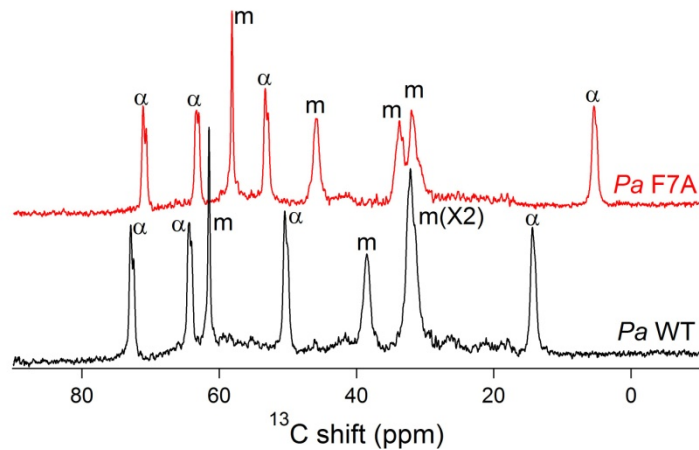

**Figure S9.** 1-D  $^{13}\text{C}$  NMR spectra of *Pa* and *Pa* F7A in the  $\text{Fe}^{\text{III}}$  oxidation state labeled with 5- $^{13}\text{C}$ -ALA.

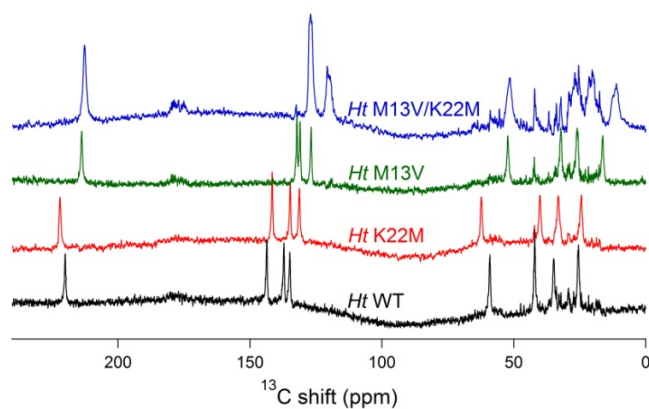

**Figure S10.** 1-D  $^{13}\text{C}$  NMR spectra of the 4- $^{13}\text{C}$ -ALA labeled samples of the *Ht* series in the  $\text{Fe}^{\text{III}}$  oxidation state.

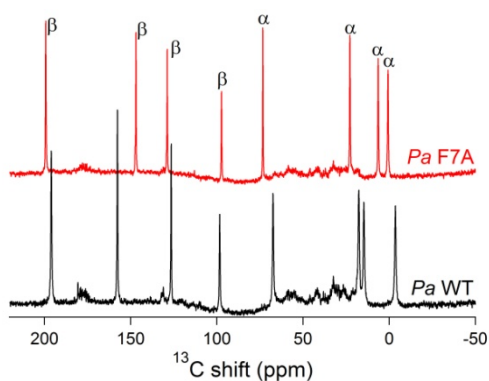

**Figure S11.** 1-D  $^{13}\text{C}$  NMR spectra of the 4- $^{13}\text{C}$ -ALA labeled samples of *Pa* WT and *Pa* F7A in the  $\text{Fe}^{\text{III}}$  oxidation state.

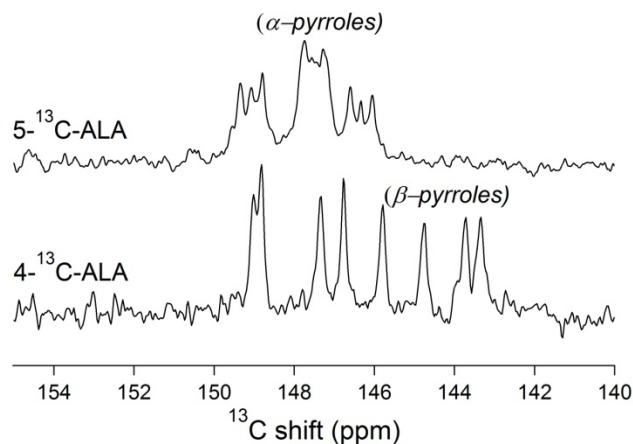

**Figure S12.** 1-D  $^{13}\text{C}$  NMR spectra of *Pa* WT with both ALA labeling patterns in the  $\text{Fe}^{\text{II}}$  oxidation state. The splittings observed in the spectrum of the 5- $^{13}\text{C}$ -ALA labeled sample are a result of adjacent  $^{13}\text{C}$  isotopes with a  $^1J_{\text{CC}}$  value of  $\sim 67$  Hz. The samples are also only partially labeled, accounting for the complexity of the observed spectrum.

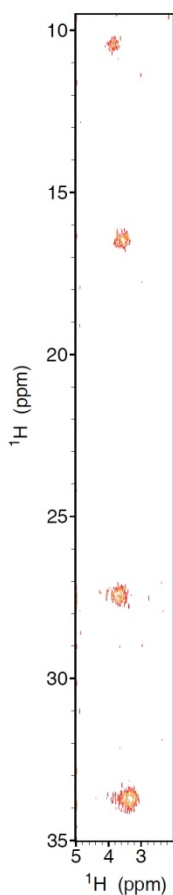

**Figure S13.** EXSY NMR spectrum of *Pa* F7A showing crosspeaks of the heme methyl  $^1\text{H}$  resonances between the oxidized and reduced states.

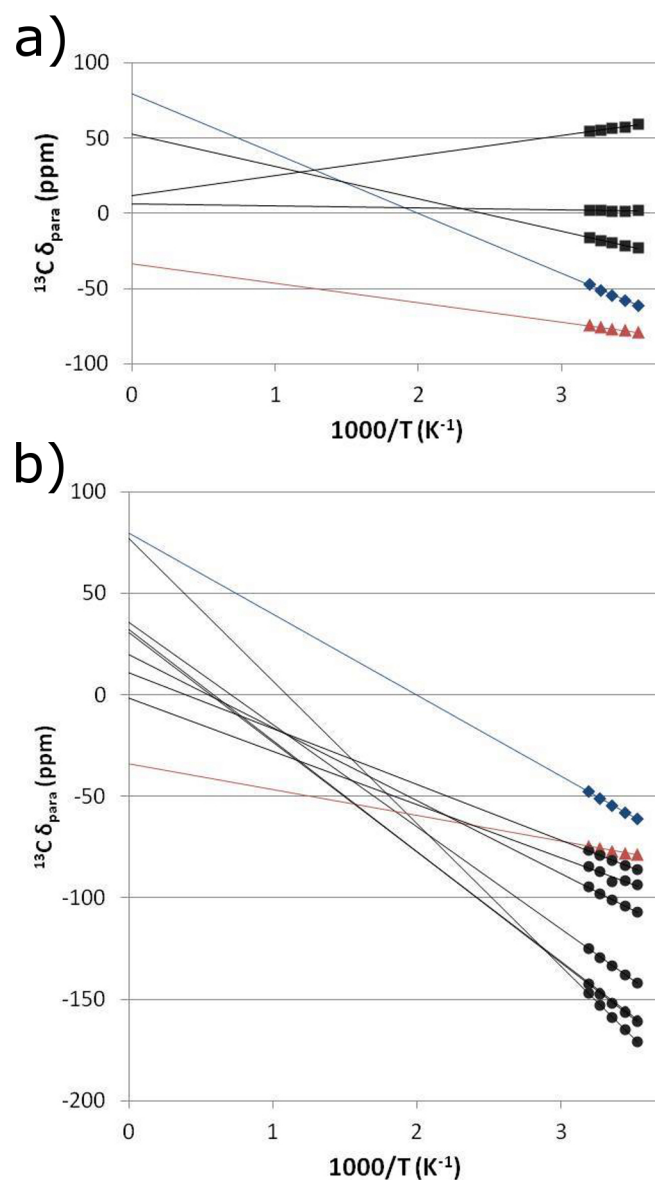

**Figure S14.** (a) Temperature dependence of the three unambiguously assigned  $\beta$ -pyrrole  $^{13}\text{C}$  shifts of *Pa* F7A (black squares) compared to the two peaks with ambiguous assignments (blue diamonds, red triangles). (b) Temperature dependence of the seven unambiguously assigned  $\alpha$ -pyrrole  $^{13}\text{C}$  shifts of *Pa* F7A (black circles) compared to the two peaks with ambiguous assignments (blue diamonds, red triangles). (a and b) The blue diamonds represent the peak tentatively assigned to a  $\beta$ -pyrrole carbon based on its lower shift and temperature dependence. The red triangles represent the peak tentatively assigned to an  $\alpha$ -pyrrole carbon. Individual shifts are reported in Table S11. Data for *Pa* WT is shown in Figure 3 of the main article.



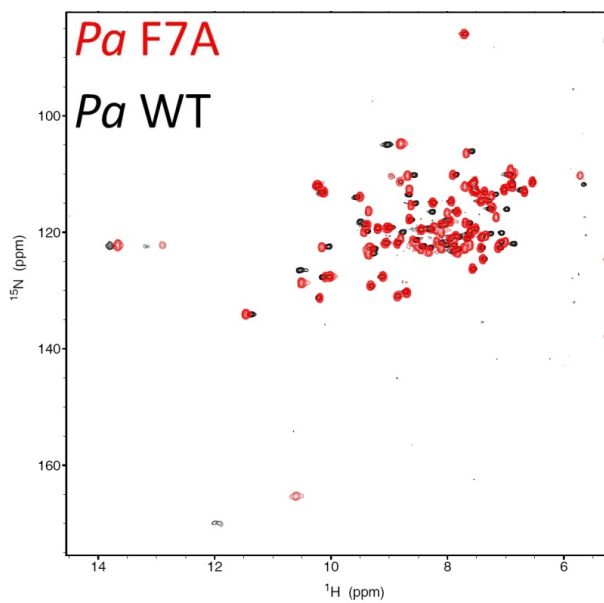

**Figure S15.** Overlay of  $^1\text{H}$ - $^{15}\text{N}$  HSQC spectra of  $\text{Fe}^{\text{III}}$  *Pa* WT and *Pa* F7A at 25 °C. The axial His  $\delta_1$ -NH peaks are the two with the  $^{15}\text{N}$  shift > 160 ppm.

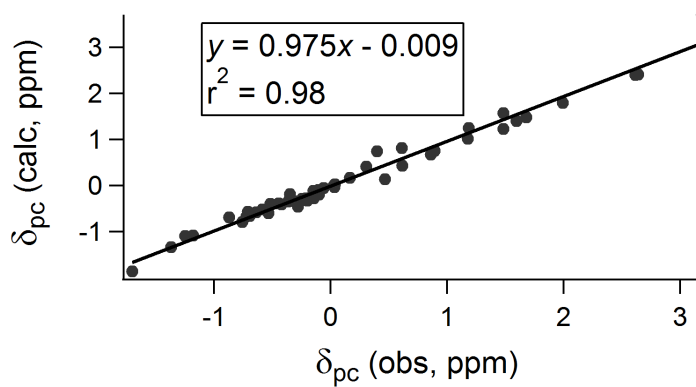

**Figure S16.** Plot of calculated versus observed pseudocontact shifts used for the determination of the magnetic axes of *Ht* WT at 40 °C.

**Equations S1 and S2.** Inclusion of a ligand-centered pseudocontact shift term in the porphyrin spin density calculations.

Equation S1:

$$\left(\delta_{FC} + \delta_{PC}^{LC}\right)_{\beta} = \left[ \left( \frac{\beta g S(S+1)}{\gamma_I \hbar 3 k_B T} \right) (S^C + 3Q_{CC'}^C + Q_{CC}^C) + D \right] \rho_{\beta}^{\pi} + \left( \frac{\beta g S(S+1)}{\gamma_I \hbar 3 k_B T} \right) (Q_{CC}^C \rho_{\alpha}^{\pi})$$

Equation S2:

$$\left(\delta_{FC} + \delta_{PC}^{LC}\right)_{\alpha} = \left[ \left( \frac{\beta g S(S+1)}{\gamma_I \hbar 3 k_B T} \right) (S^C + 2Q_{CC'}^C + Q_{CN}^C) + D \right] \rho_{\alpha}^{\pi} + \left( \frac{\beta g S(S+1)}{\gamma_I \hbar 3 k_B T} \right) (Q_{CC}^C \rho_{\beta}^{\pi} + Q_{CC}^C \rho_{meso}^{\pi} + Q_{NC}^C \rho_N^{\pi})$$

**Table S1.** Euler rotation angles and magnetic anisotropies *Pa* cyt *c*<sub>551</sub> at 25 °C and *Ht* cyt *c*<sub>552</sub> at 40 °C.

|                                  | $\alpha$ | $\beta$ | $\gamma$ | $\Delta\chi_{ax}$ ( $/10^{-32}$ m <sup>3</sup> ) | $\Delta\chi_{rh}$ ( $/10^{-32}$ m <sup>3</sup> ) |
|----------------------------------|----------|---------|----------|--------------------------------------------------|--------------------------------------------------|
| <i>Pa</i> WT <sup>a</sup>        | 90°      | 5°      | 258°     | 2.98                                             | -1.13                                            |
| <i>Pa</i> F7A <sup>b</sup>       | 90°      | 5°      | 258°     | 2.86                                             | -1.26                                            |
| <i>Ht</i> WT <sup>c</sup>        | 81°      | -3.5°   | 230°     | 2.81                                             | -0.494                                           |
| <i>Ht</i> K22M <sup>b</sup>      | 81°      | -3.5°   | 230°     | 2.66                                             | -0.498                                           |
| <i>Ht</i> M13V <sup>b</sup>      | 81°      | -3.5°   | 230°     | 2.52                                             | -0.506                                           |
| <i>Ht</i> M13V/K22M <sup>b</sup> | 81°      | -3.5°   | 230°     | 2.44                                             | -0.514                                           |

<sup>a</sup>Values taken from ref. 1. <sup>b</sup>Values scaled from *Pa* or *Ht* WT<sup>1</sup> according to the variant's *g* values determined from EPR.<sup>2</sup> <sup>c</sup>Values determined herein.

**Table S2.** Selected chemical shifts of heme and axial Met of reduced (Fe<sup>II</sup>) *Pa* WT, determined herein. Shifts for the axial His of reduced *Ht* are provided (from ref. 3). These values were used as diamagnetic reference shifts.

|                                                  | $\delta_{\text{dia}}$ (ppm) |
|--------------------------------------------------|-----------------------------|
| <sup>1</sup> H methyl                            | 3.51                        |
| <sup>13</sup> C methyl                           | 14.68                       |
| <sup>1</sup> H meso                              | 9.55                        |
| <sup>13</sup> C meso                             | 99.7                        |
| <sup>13</sup> C $\alpha$ -pyrrole                | 147.7                       |
| <sup>13</sup> C $\beta$ -pyrrole                 | 144.8                       |
| Met61 $\epsilon$ -C <sup>1</sup> H <sub>3</sub>  | -2.9                        |
| His16 $\delta_1$ - <sup>15</sup> N <sup>a</sup>  | 120.4                       |
| His 16 $\delta_1$ -N <sup>1</sup> H <sup>a</sup> | 6.73                        |

<sup>a</sup>These values are assignments of reduced *Ht* cyt *c*<sub>552</sub>.<sup>3</sup>

**Table S3.** Values used for the proportionality constants between spin density and the hyperfine coupling constant, A<sup>H</sup>. These are used in Equations 6–10 in the main text.

|             |           |
|-------------|-----------|
| $Q_{CH}^H$  | -63 MHz   |
| $Q_{C'C}^C$ | -39 MHz   |
| $S^C$       | -35.5 MHz |
| $Q_{CC'}^C$ | 40.3 MHz  |
| $Q_{CH}^C$  | 54.6 MHz  |
| $Q_{CN}^C$  | 40.3 MHz  |
| $Q_{NC}^C$  | -39 MHz   |

**Table S4.**  $^1\text{H}$  resonance assignments for *Ht* WT determined at 40 °C at pH 7.0. Assignments were performed in both the ferric (ox) and ferrous (red) states. The pseudocontact shifts ( $\delta_{\text{pc}}$ ) were calculated by subtracting  $\delta_{\text{red}}$  from  $\delta_{\text{ox}}$ , and were used to determine the magnetic axes and anisotropy. QB designates methyl groups for which rotationally averaged coordinates were used in the magnetic axes fitting procedure.

| Residue | Atom | $\delta_{\text{ox}}$ | $\delta_{\text{red}}$ | $\delta_{\text{pc}}$ |
|---------|------|----------------------|-----------------------|----------------------|
| A7      | HN   | 7.48                 | 7.85                  | -0.36                |
| K8      | HN   | 7.95                 | 8.08                  | -0.13                |
| Q9      | HN   | 8.35                 | 8.44                  | -0.10                |
| K10     | HN   | 7.89                 | 8.41                  | -0.52                |
| C12     | HN   | 8.10                 | 8.85                  | -0.76                |
| C12     | HA   | 3.34                 | 5.04                  | -1.70                |
| M13     | HN   | 8.36                 | 7.89                  | 0.47                 |
| M13     | HN   | 6.25                 | 4.65                  | 1.60                 |
| D17     | HN   | 10.20                | 7.56                  | 2.64                 |
| D17     | HA   | 5.87                 | 4.39                  | 1.48                 |
| L18     | HN   | 9.13                 | 8.24                  | 0.89                 |
| V23     | HN   | 7.70                 | 7.08                  | 0.61                 |
| V23     | HA   | 3.65                 | 3.99                  | -0.35                |
| A26     | HN   | 9.47                 | 8.30                  | 1.18                 |
| A26     | HA   | 5.81                 | 3.82                  | 1.99                 |
| A26     | QB   | 1.51                 | 0.65                  | 0.86                 |
| Y27     | HN   | 9.45                 | 7.77                  | 1.68                 |
| Y27     | HA   | 4.41                 | 4.01                  | 0.40                 |
| D29     | HN   | 7.07                 | 6.76                  | 0.31                 |
| V30     | HN   | 7.76                 | 7.59                  | 0.17                 |
| V30     | HA   | 3.79                 | 4.06                  | -0.27                |
| V30     | HB   | 2.17                 | 2.37                  | -0.20                |
| K32     | HN   | 7.36                 | 7.33                  | 0.03                 |
| K32     | HA   | 4.07                 | 4.13                  | -0.06                |
| L44     | HN   | 8.54                 | 8.77                  | -0.23                |
| L44     | HA   | 3.29                 | 3.57                  | -0.28                |

| Residue | Atom | $\delta_{\text{ox}}$ | $\delta_{\text{red}}$ | $\delta_{\text{pc}}$ |
|---------|------|----------------------|-----------------------|----------------------|
| A45     | HN   | 8.57                 | 8.71                  | -0.14                |
| A45     | HN   | 3.50                 | 3.85                  | -0.35                |
| A45     | QB   | 1.23                 | 1.37                  | -0.15                |
| I48     | HN   | 8.51                 | 7.90                  | 0.62                 |
| K50     | HN   | 9.32                 | 7.84                  | 1.48                 |
| K50     | HA   | 5.09                 | 3.91                  | 1.19                 |
| G51     | HN   | 10.31                | 7.12                  | 3.19                 |
| G52     | HN   | 10.12                | 7.50                  | 2.62                 |
| V55     | HN   | 9.83                 | 10.28                 | -0.45                |
| V55     | HA   | 3.73                 | 3.94                  | -0.21                |
| V55     | HB   | 2.06                 | 2.59                  | -0.53                |
| W56     | HN   | 9.58                 | 10.45                 | -0.87                |
| W56     | HA   | 4.28                 | 4.70                  | -0.42                |
| W56     | HD1  | 6.40                 | 7.76                  | -1.37                |
| W56     | HE1  | 10.94                | 12.12                 | -1.18                |
| V59     | HN   | 7.00                 | 7.72                  | -0.72                |
| V59     | HA   | 3.93                 | 4.56                  | -0.64                |
| V59     | HB   | 1.03                 | 2.28                  | -1.25                |
| L74     | HN   | 8.29                 | 8.88                  | -0.59                |
| L74     | HA   | 3.63                 | 4.33                  | -0.70                |
| I78     | HN   | 8.00                 | 8.71                  | -0.71                |
| I78     | HA   | 2.24                 | 2.48                  | -0.24                |
| I81     | HN   | 7.08                 | 7.18                  | -0.10                |
| I81     | HA   | 3.68                 | 3.65                  | 0.03                 |
| I81     | HB   | 1.67                 | 1.63                  | 0.04                 |
|         |      |                      |                       |                      |

**Table S5.** Contributions to the paramagnetic chemical shifts (ppm) of the heme and axial ligands of *Ht* WT and *Ht* K22M at 40 °C.

|                                   | <i>Ht</i> WT    |                    |                                  | <i>Ht</i> K22M  |                    |                                  |
|-----------------------------------|-----------------|--------------------|----------------------------------|-----------------|--------------------|----------------------------------|
|                                   | $\delta_{para}$ | $\delta_{PC}^{MC}$ | $\delta_{FC} + \delta_{PC}^{LC}$ | $\delta_{para}$ | $\delta_{PC}^{MC}$ | $\delta_{FC} + \delta_{PC}^{LC}$ |
| <sup>1</sup> H methyl             | 18.15           | -2.61              | 20.76                            | 18.02           | -2.48              | 20.50                            |
| <sup>13</sup> C methyl            | -51.4           | -4.3               | -47.1                            | -51.4           | -4.1               | -47.3                            |
| <sup>1</sup> H meso               | -5.92           | -7.71              | 1.79                             | -5.97           | -7.29              | 1.32                             |
| <sup>13</sup> C meso              | -64.0           | -17.9              | -46.0                            | -64.2           | -17.0              | -47.2                            |
| <sup>13</sup> C $\alpha$ -pyrrole | -93.9           | -23.6              | -70.2                            | -93.6           | -22.3              | -71.2                            |
| <sup>13</sup> C $\beta$ -pyrrole  | 14.1            | -9.2               | 23.3                             | 12.6            | -8.7               | 21.3                             |

**Table S6.** Contributions to the paramagnetic chemical shifts (ppm) of the heme and axial ligands of *Ht* M13V and *Ht* M13V/K22M at 40 °C.

|                                   | <i>Ht</i> M13V  |                    |                                  | <i>Ht</i> M13V/K22M |                    |                                  |
|-----------------------------------|-----------------|--------------------|----------------------------------|---------------------|--------------------|----------------------------------|
|                                   | $\delta_{para}$ | $\delta_{PC}^{MC}$ | $\delta_{FC} + \delta_{PC}^{LC}$ | $\delta_{para}$     | $\delta_{PC}^{MC}$ | $\delta_{FC} + \delta_{PC}^{LC}$ |
| <sup>1</sup> H methyl             | 17.39           | -2.36              | 19.76                            | 17.07               | -2.30              | 19.37                            |
| <sup>13</sup> C methyl            | -51.1           | -3.9               | -47.2                            | -51.2               | -3.8               | -47.4                            |
| <sup>1</sup> H meso               | -6.28           | -6.90              | 0.62                             | -6.37               | -6.67              | 0.30                             |
| <sup>13</sup> C meso              | -62.8           | -16.1              | -46.7                            | -62.8               | -15.5              | -47.3                            |
| <sup>13</sup> C $\alpha$ -pyrrole | -102.9          | -21.1              | -81.8                            | -105.8              | -20.4              | -85.4                            |
| <sup>13</sup> C $\beta$ -pyrrole  | 6.2             | -8.2               | 14.4                             | 1.9                 | -7.9               | 9.8                              |

**Table S7.** Contributions to the sum of the average contact and ligand-centered pseudocontact shifts (in ppm) for selected heme nuclei. The contributions from the spin density on each of the nuclei are shown independently. The data shown are for *Ht* WT at 40 °C.

|                                   | $\rho_{meso}^{\pi}$ | $\rho_{\beta\text{-pyrrole}}^{\pi}$ | $\rho_{\alpha\text{-pyrrole}}^{\pi}$ | $\rho_{N\text{-pyrrole}}^{\pi}$ |
|-----------------------------------|---------------------|-------------------------------------|--------------------------------------|---------------------------------|
| <sup>1</sup> H meso               | 1.8                 | -                                   | -                                    | -                               |
| <sup>13</sup> C methyl            | -                   | -47.1                               | -                                    | -                               |
| <sup>13</sup> C meso              | -9.9                | -                                   | -36.2                                | -                               |
| <sup>13</sup> C $\beta$ -pyrrole  | -                   | 41.4                                | -18.1                                | -                               |
| <sup>13</sup> C $\alpha$ -pyrrole | 4.4                 | -47.1                               | 34.0                                 | -61.4                           |

**Table S8.** Contributions to the change in the average contact and ligand-centered pseudocontact shifts (in ppm) for selected heme nuclei. The contributions from the spin density on each of the nuclei are shown independently. The data shown are for *Ht* K22M–WT at 40 °C.

|                           | $\rho_{meso}^{\pi}$ | $\rho_{\beta\text{-pyrrole}}^{\pi}$ | $\rho_{\alpha\text{-pyrrole}}^{\pi}$ | $\rho_{N\text{-pyrrole}}^{\pi}$ |
|---------------------------|---------------------|-------------------------------------|--------------------------------------|---------------------------------|
| <sup>1</sup> H meso       | −0.55               | -                                   | -                                    | -                               |
| <sup>13</sup> C methyl    | -                   | −0.16                               | -                                    | -                               |
| <sup>13</sup> C meso      | 3.04                | -                                   | −4.24                                | -                               |
| <sup>13</sup> C β-pyrrole | -                   | 0.14                                | −2.12                                | -                               |
| <sup>13</sup> C α-pyrrole | −1.35               | −0.16                               | 3.98                                 | −3.48                           |

**Table S9.** Contributions to the change in the average contact and ligand-centered pseudocontact shifts (in ppm) for selected heme nuclei. The contributions from the spin density on each of the nuclei are shown independently. The data shown are for *Ht* M13V–WT at 40 °C.

|                           | $\rho_{meso}^{\pi}$ | $\rho_{\beta\text{-pyrrole}}^{\pi}$ | $\rho_{\alpha\text{-pyrrole}}^{\pi}$ | $\rho_{N\text{-pyrrole}}^{\pi}$ |
|---------------------------|---------------------|-------------------------------------|--------------------------------------|---------------------------------|
| <sup>1</sup> H meso       | −2.73               | -                                   | -                                    | -                               |
| <sup>13</sup> C methyl    | -                   | 0.40                                | -                                    | -                               |
| <sup>13</sup> C meso      | 15.1                | -                                   | −16.1                                | -                               |
| <sup>13</sup> C β-pyrrole | -                   | −0.35                               | −8.03                                | -                               |
| <sup>13</sup> C α-pyrrole | −6.73               | 0.40                                | 15.1                                 | −20.3                           |

**Table S10.** Contributions to the change in the average contact and ligand-centered pseudocontact shifts (in ppm) for selected heme nuclei. The contributions from the spin density on each of the nuclei are shown independently. The data shown are for *Ht* M13V/K22M–WT at 40 °C.

|                           | $\rho_{meso}^{\pi}$ | $\rho_{\beta\text{-pyrrole}}^{\pi}$ | $\rho_{\alpha\text{-pyrrole}}^{\pi}$ | $\rho_{N\text{-pyrrole}}^{\pi}$ |
|---------------------------|---------------------|-------------------------------------|--------------------------------------|---------------------------------|
| <sup>1</sup> H meso       | −4.07               | -                                   | -                                    | -                               |
| <sup>13</sup> C methyl    | -                   | 0.53                                | -                                    | -                               |
| <sup>13</sup> C meso      | 22.5                | -                                   | −24.3                                | -                               |
| <sup>13</sup> C β-pyrrole | -                   | −0.46                               | −12.1                                | -                               |
| <sup>13</sup> C α-pyrrole | −10.0               | 0.53                                | 22.8                                 | −28.5                           |

**Table S11.** Temperature dependent shifts of meso,  $\alpha$ -pyrrole, and  $\beta$ -pyrrole core heme  $^{13}\text{C}$  shifts in ppm collected for  $\text{Fe}^{\text{III}}$  *Pa* WT at 25 °C.

| $^{13}\text{C}$ labeling pattern    | Nucleus           | 283 K | 290.5 K | 298 K | 305.5 K | 313 K |
|-------------------------------------|-------------------|-------|---------|-------|---------|-------|
| $5\text{-}^{13}\text{C}\text{-ALA}$ | meso              | 19.5  | 22.9    | 26.1  | 29.4    | 32.0  |
|                                     | meso              | 22.7  | 25.2    | 27.3  | 29.4    | 32.0  |
|                                     | meso              | 30.6  | 32.6    | 34.5  | 36.6    | 38.5  |
|                                     | meso              | 56.3  | 56.8    | 59.0  | 60.3    | 61.5  |
| $5\text{-}^{13}\text{C}\text{-ALA}$ | $\alpha$ -pyrrole | -5.7  | -0.7    | 4.0   | 9.2     | 14.3  |
|                                     | $\alpha$ -pyrrole | 37.9  | 40.6    | 43.5  | 46.8    | 50.3  |
|                                     | $\alpha$ -pyrrole | 54.7  | 57.7    | 59.0  | 61.6    | 64.3  |
|                                     | $\alpha$ -pyrrole | 62.8  | 65.0    | 67.4  | 69.9    | 72.8  |
| $4\text{-}^{13}\text{C}\text{-ALA}$ | $\alpha$ -pyrrole | -27.8 | -21.8   | -16.0 | -9.9    | -3.6  |
|                                     | $\alpha$ -pyrrole | -4.2  | 0.5     | 5.0   | 9.8     | 14.7  |
|                                     | $\alpha$ -pyrrole | -0.1  | 4.2     | 8.4   | 12.9    | 17.7  |
|                                     | $\alpha$ -pyrrole | 61.7  | 62.7    | 63.9  | 65.5    | 67.4  |
| $4\text{-}^{13}\text{C}\text{-ALA}$ | $\beta$ -pyrrole  | 84.1  | 87.5    | 90.9  | 94.5    | 98.3  |
|                                     | $\beta$ -pyrrole  | 117.3 | 119.3   | 121.5 | 123.8   | 126.5 |
|                                     | $\beta$ -pyrrole  | 155.8 | 156.1   | 156.4 | 156.9   | 157.6 |
|                                     | $\beta$ -pyrrole  | 201.1 | 199.3   | 197.9 | 196.8   | 196.0 |

**Table S12.** Temperature dependent shifts of meso,  $\alpha$ -pyrrole, and  $\beta$ -pyrrole core heme  $^{13}\text{C}$  shifts in ppm collected for  $\text{Fe}^{\text{III}}$  *Pa* F7A at 25 °C.

| $^{13}\text{C}$ labeling pattern    | Nucleus           | 283 K | 290.5 K | 298 K | 305.5 K | 313 K |
|-------------------------------------|-------------------|-------|---------|-------|---------|-------|
| $5\text{-}^{13}\text{C}\text{-ALA}$ | meso              | 19.2  | 22.3    | 25.4  | 28.8    | 31.8  |
|                                     | meso              | 23.9  | 26.4    | 28.8  | 31.3    | 33.8  |
|                                     | meso              | 37.5  | 39.9    | 41.9  | 43.9    | 45.8  |
|                                     | meso              | 52.8  | 54.2    | 58.3  | 56.9    | 58.1  |
| $5\text{-}^{13}\text{C}\text{-ALA}$ | $\alpha$ -pyrrole | -13.3 | -8.8    | -4.4  | 0.5     | 5.3   |
|                                     | $\alpha$ -pyrrole | 40.9  | 43.8    | 46.7  | 49.9    | 53.2  |
|                                     | $\alpha$ -pyrrole | 54.2  | 56.3    | 55.6  | 60.7    | 63.2  |
|                                     | $\alpha$ -pyrrole | 61.6  | 63.8    | 66.0  | 68.4    | 71.0  |
| $4\text{-}^{13}\text{C}\text{-ALA}$ | $\alpha$ -pyrrole | -23.1 | -17.1   | -11.4 | -5.3    | 0.7   |
|                                     | $\alpha$ -pyrrole | -11.9 | -7.5    | -3.2  | 1.6     | 6.4   |
|                                     | $\alpha$ -pyrrole | 5.7   | 10.0    | 14.1  | 18.5    | 22.8  |
|                                     | $\alpha$ -pyrrole | 68.9  | 69.8    | 70.7  | 72.0    | 73.3  |
| $4\text{-}^{13}\text{C}\text{-ALA}$ | $\beta$ -pyrrole  | 83.7  | 86.9    | 90.2  | 93.6    | 97.3  |
|                                     | $\beta$ -pyrrole  | 121.5 | 123.1   | 124.8 | 126.7   | 128.8 |
|                                     | $\beta$ -pyrrole  | 146.4 | 146.2   | 146.1 | 146.4   | 146.9 |
|                                     | $\beta$ -pyrrole  | 203.7 | 202.2   | 201.0 | 200.0   | 199.2 |

**Table S13.** List of heme  $^1\text{H}$  and  $^{13}\text{C}$  shifts in ppm used in this study. Data for the  $\text{Fe}^{\text{III}}$  forms of *Pa* cyt *c*<sub>551</sub> and *Ht* cyt *c*<sub>552</sub> variants were collected at 25 °C and 40 °C, respectively. Specific assignments were not made.

| Nucleus                                        | <i>Pa</i> WT | <i>Pa</i> F7A | <i>Ht</i> WT | <i>Ht</i> K22M | <i>Ht</i> M13V | <i>Ht</i> M13V<br>/K22M |
|------------------------------------------------|--------------|---------------|--------------|----------------|----------------|-------------------------|
| $^{13}\text{C}$ meso <sup>a</sup>              | 26.3         | 25.8          | 23.8         | 23.2           | 23.3           | 22.8                    |
| $^{13}\text{C}$ meso <sup>a</sup>              | 27.7         | 29.1          | 34.1         | 32.9           | 35.5           | 34.5                    |
| $^{13}\text{C}$ meso <sup>a</sup>              | 34.8         | 42.2          | 34.7         | 35.2           | 38.9           | 39.3                    |
| $^{13}\text{C}$ meso <sup>a</sup>              | 59.2         | 55.7          | 50.3         | 50.7           | 49.9           | 50.9                    |
| $^1\text{H}$ meso <sup>a</sup>                 | 8.73         | 8.99          | 0.14         | -0.14          | -0.12          | -0.45                   |
| $^1\text{H}$ meso <sup>a</sup>                 | 6.20         | 6.54          | 0.83         | 0.57           | -0.03          | -0.32                   |
| $^1\text{H}$ meso <sup>a</sup>                 | -1.36        | -2.23         | 6.44         | 6.58           | 5.88           | 6.00                    |
| $^1\text{H}$ meso <sup>a</sup>                 | -3.03        | -2.97         | 7.10         | 7.31           | 7.33           | 7.48                    |
| $^{13}\text{C}$ $\alpha$ -pyrrole <sup>a</sup> | 4.0          | -4.4          | 38.9         | 38.2           | 27.3           | 24.1                    |
| $^{13}\text{C}$ $\alpha$ -pyrrole <sup>a</sup> | 43.5         | 46.7          | 74.9         | 76.6           | 64.4           | 63.3                    |
| $^{13}\text{C}$ $\alpha$ -pyrrole <sup>a</sup> | 59.0         | 55.6          | 74.9         | 76.6           | 66.0           | 65.6                    |
| $^{13}\text{C}$ $\alpha$ -pyrrole <sup>a</sup> | 67.4         | 66.0          | 80.6         | 81.6           | 73.9           | 72.4                    |
| $^{13}\text{C}$ $\alpha$ -pyrrole <sup>b</sup> | -16.0        | -11.4         | 25.5         | 24.5           | 16.4           | 11.3                    |
| $^{13}\text{C}$ $\alpha$ -pyrrole <sup>b</sup> | 5.0          | -3.2          | 34.9         | 33.2           | 26.0           | 20.3                    |
| $^{13}\text{C}$ $\alpha$ -pyrrole <sup>b</sup> | 8.4          | 14.1          | 42.1         | 40.1           | 32.2           | 26.6                    |
| $^{13}\text{C}$ $\alpha$ -pyrrole <sup>b</sup> | 63.9         | 70.7          | 59.1         | 62.3           | 52.3           | 51.7                    |
| $^{13}\text{C}$ $\beta$ -pyrrole <sup>b</sup>  | 90.9         | 90.2          | 134.9        | 131.3          | 126.9          | 120.1                   |
| $^{13}\text{C}$ $\beta$ -pyrrole <sup>b</sup>  | 121.5        | 124.8         | 137.2        | 134.8          | 131.0          | 127.0                   |
| $^{13}\text{C}$ $\beta$ -pyrrole <sup>b</sup>  | 156.4        | 146.1         | 143.7        | 141.6          | 132.2          | 127.0                   |
| $^{13}\text{C}$ $\beta$ -pyrrole <sup>b</sup>  | 197.9        | 201.0         | 219.9        | 222.0          | 213.8          | 212.7                   |
| $^{13}\text{C}$ methyl                         | -21.5        | -17.0         | -42.7        | -42.4          | -43.0          | -42.9                   |
| $^{13}\text{C}$ methyl                         | -38.2        | -36.3         | -38.8        | -39.4          | -39.6          | -40.5                   |
| $^{13}\text{C}$ methyl                         | -47.5        | -49.3         | -33.3        | -32.2          | -31.2          | -30.1                   |
| $^{13}\text{C}$ methyl                         | -56.7        | -56.7         | -32.1        | -32.9          | -31.9          | -32.6                   |
| $^1\text{H}$ methyl                            | 13.21        | 10.89         | 23.95        | 23.66          | 23.33          | 22.83                   |
| $^1\text{H}$ methyl                            | 17.95        | 16.98         | 22.41        | 22.73          | 22.15          | 22.36                   |
| $^1\text{H}$ methyl                            | 24.88        | 25.47         | 22.46        | 21.63          | 20.76          | 19.67                   |
| $^1\text{H}$ methyl                            | 32.21        | 32.16         | 17.83        | 18.11          | 17.38          | 17.48                   |

<sup>a</sup>Chemical shifts obtained from samples isotopically labeled with 5- $^{13}\text{C}$ -ALA. <sup>b</sup>Chemical shifts obtained from samples isotopically labeled with 4- $^{13}\text{C}$ -ALA.



**Table S14.** Individual Fe<sup>II</sup> *Pa* WT shifts used as the  $\delta_{\text{dia}}$  reference shifts.

| <sup>13</sup> C meso <sup>a</sup> | <sup>1</sup> H meso <sup>a</sup> | <sup>13</sup> C $\alpha$ -pyrrole <sup>a</sup> | <sup>13</sup> C $\alpha$ -pyrrole <sup>b</sup> | <sup>13</sup> C $\beta$ -pyrrole <sup>b</sup> | <sup>13</sup> C methyl | <sup>1</sup> H methyl |
|-----------------------------------|----------------------------------|------------------------------------------------|------------------------------------------------|-----------------------------------------------|------------------------|-----------------------|
| 98.3                              | 9.33                             | 146.3                                          | 146.3                                          | 144.0                                         | 15.2                   | 3.35                  |
| 99.7                              | 9.45                             | 147.5                                          | 146.6                                          | 144.4                                         | 13.1                   | 3.46                  |
| 99.9                              | 9.48                             | 147.5                                          | 149.2                                          | 145.3                                         | 15.4                   | 3.51                  |
| 100.8                             | 9.93                             | 149.1                                          | 149.3                                          | 145.5                                         | 15.0                   | 3.73                  |

<sup>a</sup>Chemical shifts obtained from samples isotopically labeled with 5-<sup>13</sup>C-ALA. <sup>b</sup>Chemical shifts obtained from samples isotopically labeled with 4-<sup>13</sup>C-ALA.

## References

- (1) Zhong, L. H.; Wen, X.; Rabinowitz, T. M.; Russell, B. S.; Karan, E. F.; Bren, K. L.: Heme Axial Methionine Fluxionality in *Hydrogenobacter thermophilus* cytochrome *c*-552. *Proc. Natl. Acad. Sci. USA* **2004**, *101*, 8637-8642.
- (2) Can, M.; Zoppellaro, G.; Andersson, K. K.; Bren, K. L.: Modulation of Ligand-Field Parameters by Heme Ruffling in Cytochromes *c* Revealed by EPR Spectroscopy. *Inorg. Chem.* **2011**, *50*, 12018-12024.
- (3) Takayama, S. J.; Takahashi, Y.; Mikami, S.; Irie, K.; Kawano, S.; Yamamoto, Y.; Hemmi, H.; Kitahara, R.; Yokoyama, S.; Akasaka, K.: Local conformational transition of *Hydrogenobacter thermophilus* cytochrome *c*(552) relevant to its redox potential. *Biochemistry* **2007**, *46*, 9215-9224.
